# Supplementary material for: Defining the Protease and Protease Inhibitor (P/PI) Proteomes of Healthy and Diseased Human Skin by Modified Systematic Review
Source: MDPI journal article supplement (doi:10.3390/biom12030475), 2022-03-20

Supplementary Figure S1. Number of published articles for each protease

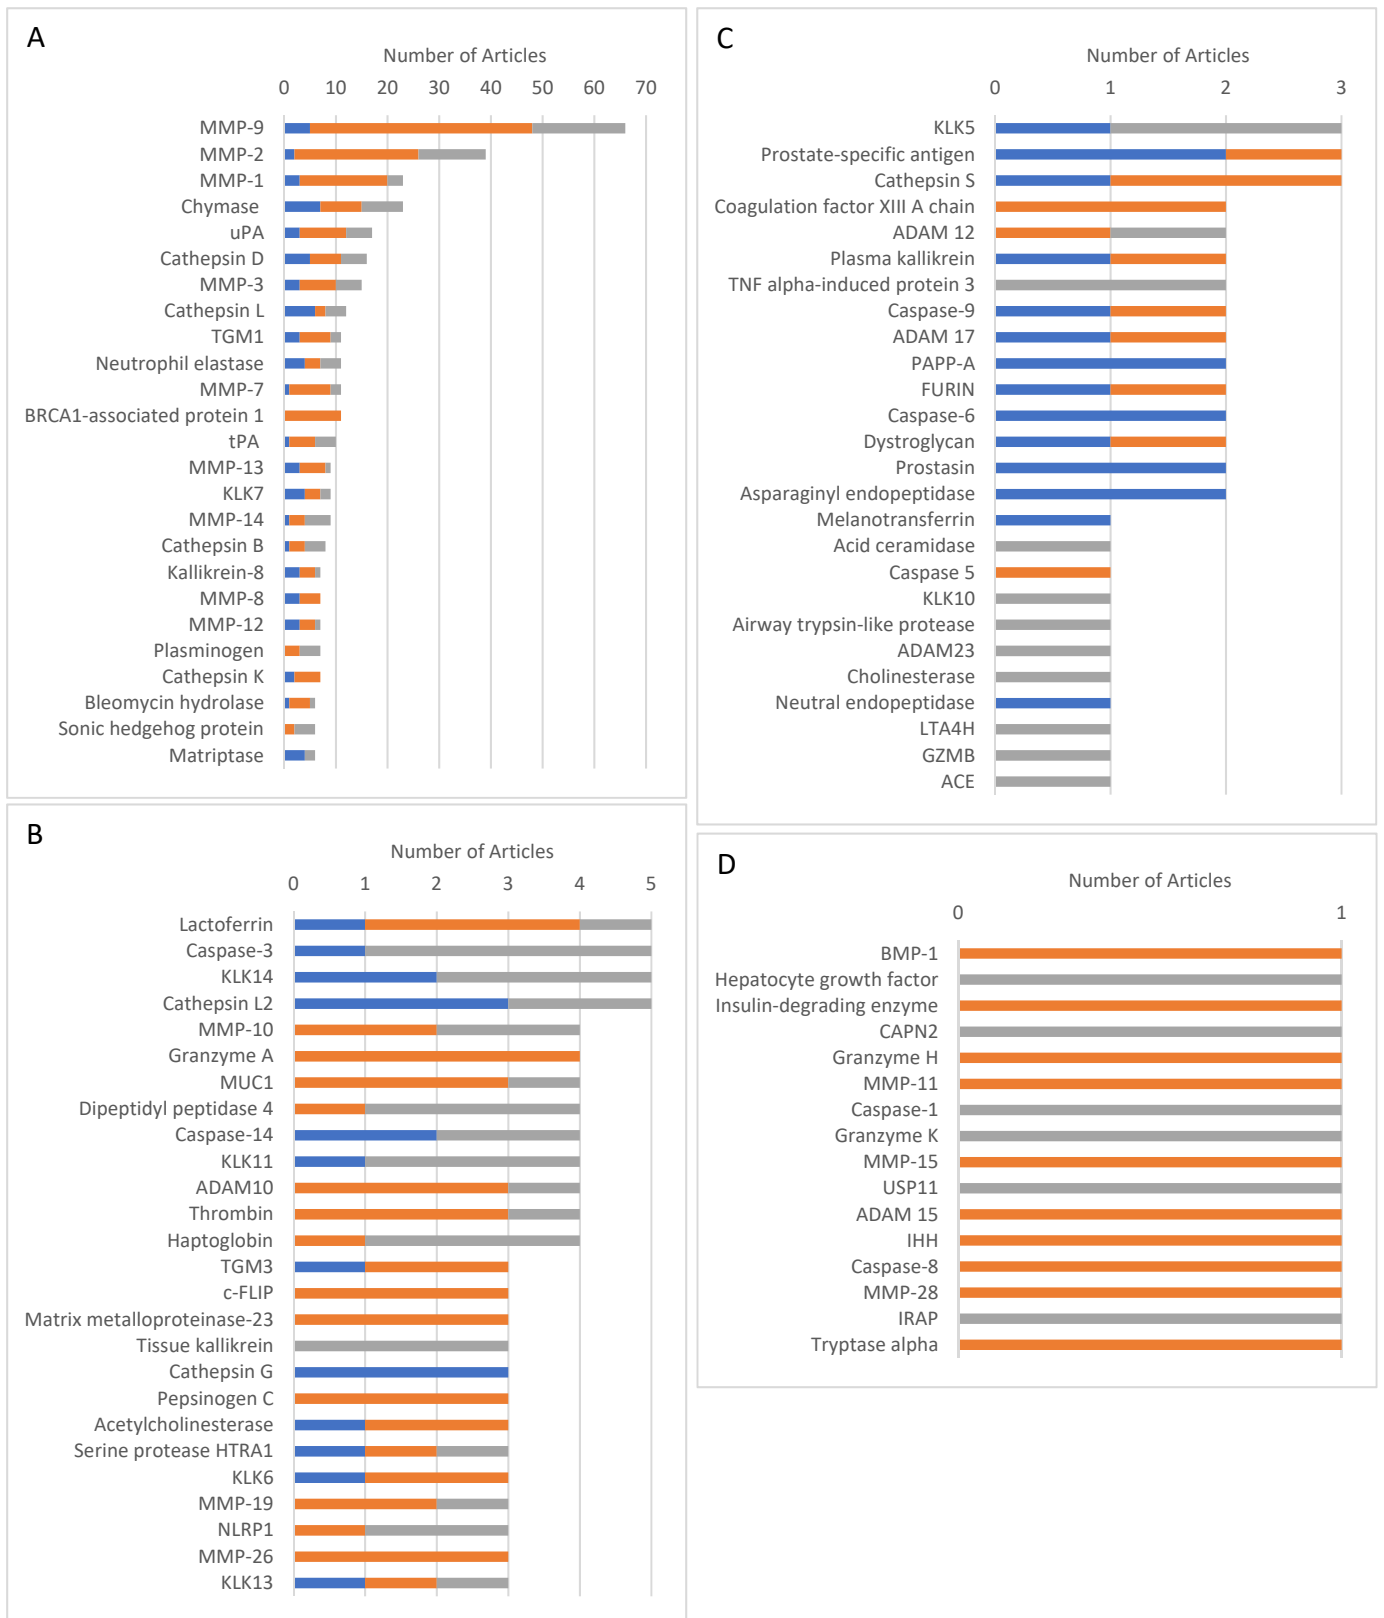

E

Number of Articles

0

1

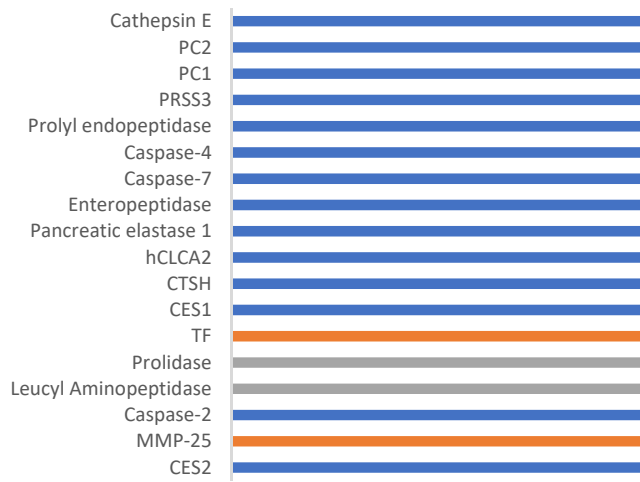

■ Normal skin only

■ Disease skin only

■ Normal and disease skin

Supplementary Figure S2. Number of published articles for each protease inhibitor

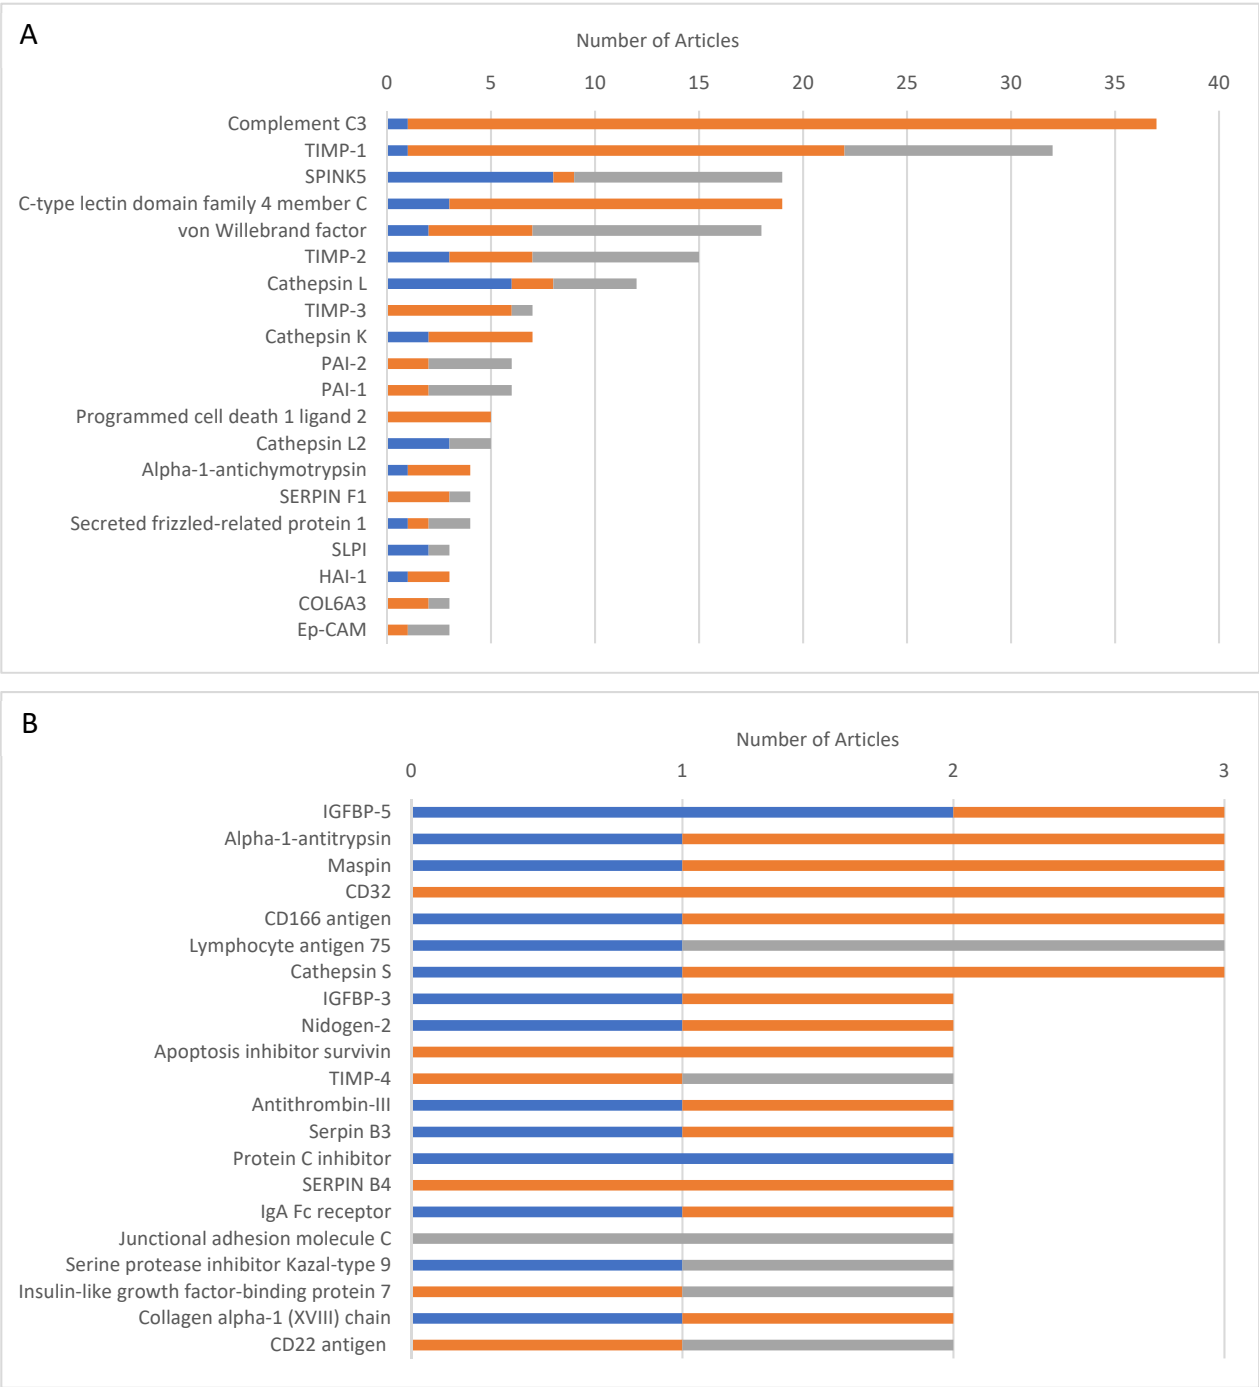

C

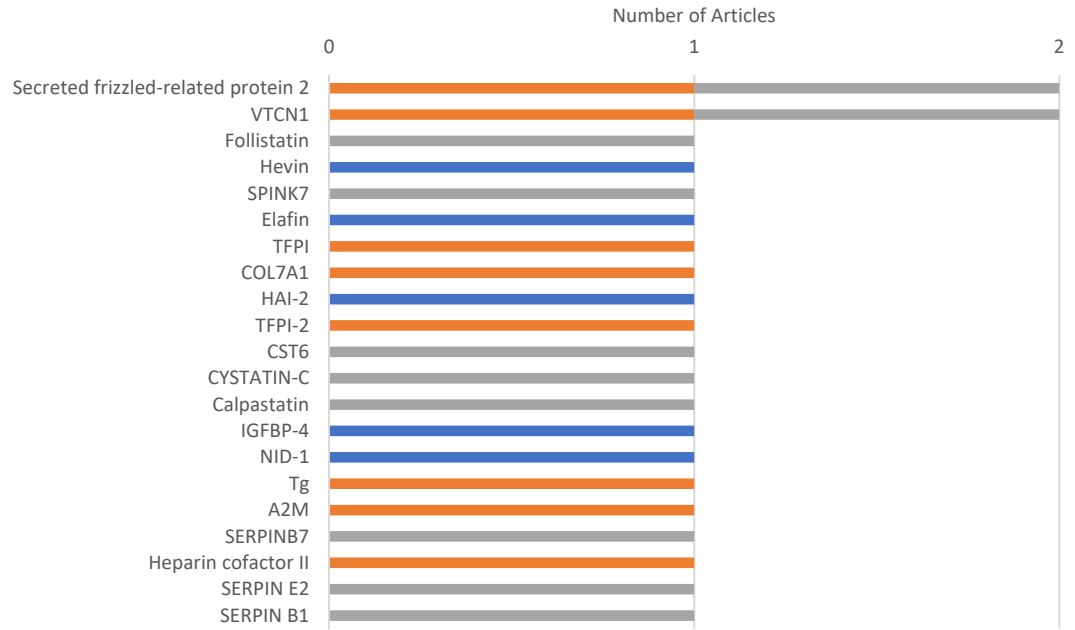

D

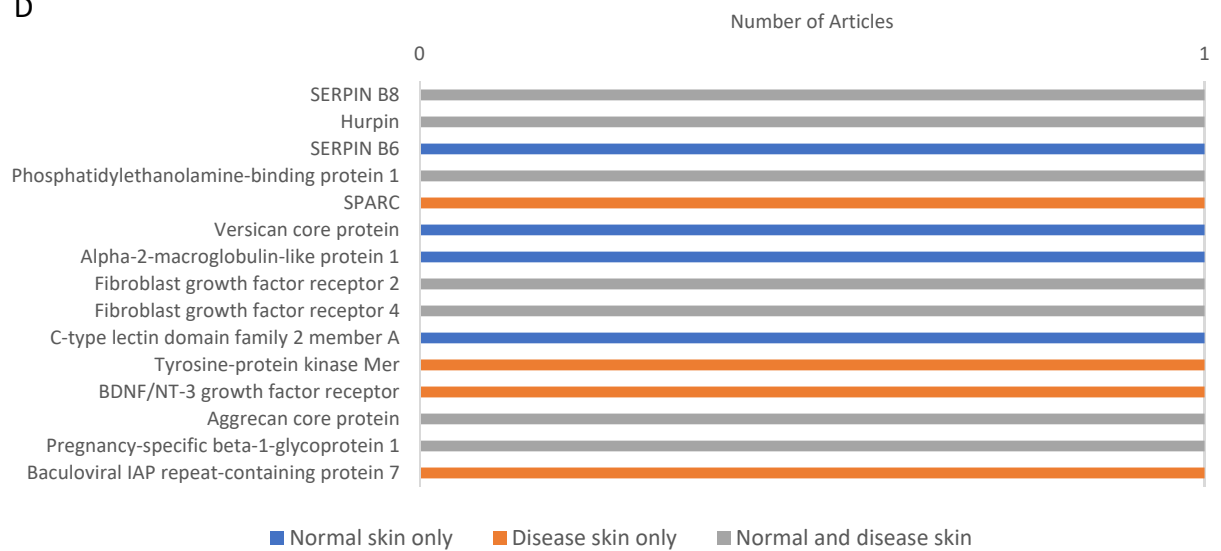

Supplement: s1 [file s1]
